# Supplementary material
Source: MDPI journal article supplement (https://www.mdpi.com/2073-4441/15/10/1856)
Supplement: s1 [file s1]

## Supplementary Material

# Reuse of Pretreated Agro-Industrial Wastewaters for Hydroponic Production of Lettuce

**Alexandra Afonso <sup>1,2,\*</sup>, Mariana Regato <sup>3</sup>, Mariana Patanita <sup>4</sup>, Silvana Luz <sup>1,5</sup>, Maria João Carvalho <sup>1</sup>, Annabel Fernandes <sup>2</sup>, Ana Lopes <sup>2</sup>, Adelaide Almeida <sup>1,2</sup>, Idália Costa <sup>3</sup> and Fátima Carvalho <sup>1,2</sup>**

<sup>1</sup> Department of Applied Sciences and Technologies, Escola Superior Agrária de Beja, Instituto Politécnico de Beja, 7800-309 Beja, Portugal; silvana.g.luz@gmail.com (S.L.); joaobcarvalho@ipbeja.pt (M.J.C.); maalmeida@ipbeja.pt (A.A.); mfcarvalho@ipbeja.pt (F.C.)

<sup>2</sup> Fiber Materials and Environmental Technologies (FibEnTech-UBI), Universidade da Beira Interior, R. Marquês de Ávila e Bolama, 6201-001 Covilhã, Portugal; annabelf@ubi.pt (A.F.); analopes@ubi.pt (A.L.)

<sup>3</sup> Department of Bioscience, Escola Superior Agrária de Beja, Instituto Politécnico de Beja, 7800-295 Beja, Portugal; mare@ipbeja.pt (M.R.); idalia.costa@ipbeja.pt (I.C.)

<sup>4</sup> MED—Mediterranean Institute for Agriculture, Environment and Development & CHANGE—Global Change and Sustainability Institute, Institute for Advanced Studies and Research, Universidade de Évora, Pólo da Mitra, Ap. 94, 7006-554 Évora, Portugal; mpatanita@uevora.pt

<sup>5</sup> Departamento de Ingeniería Química y Química Física, Instituto Universitario de Investigación del Agua, Cambio Climático y Sostenibilidad (IACYS), Universidad de Extremadura, 06006 Badajoz, Spain

\* Correspondence: alexandra.afonso@ipbeja.pt

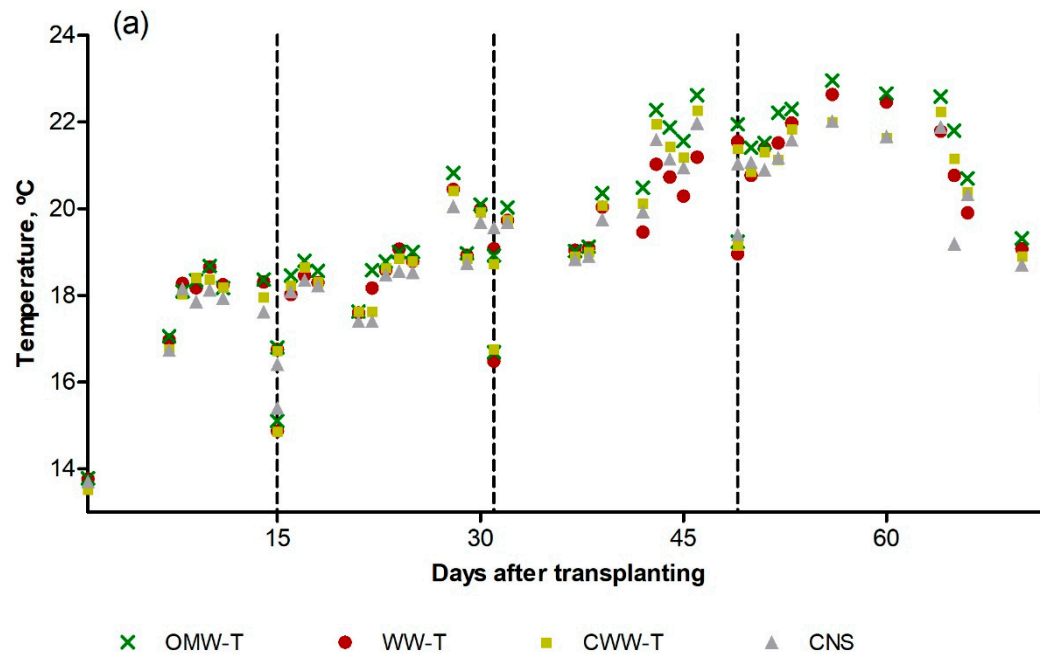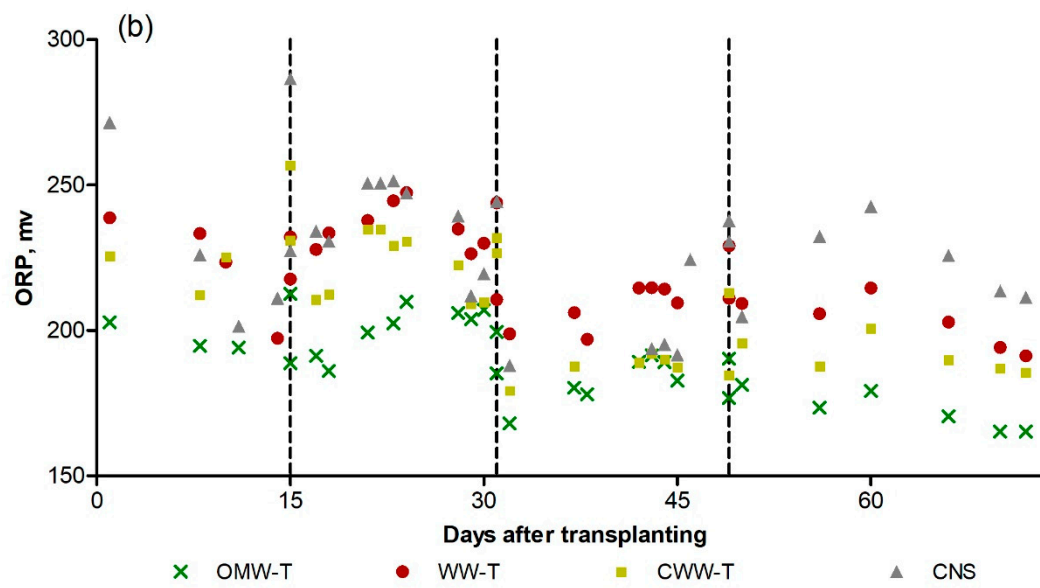

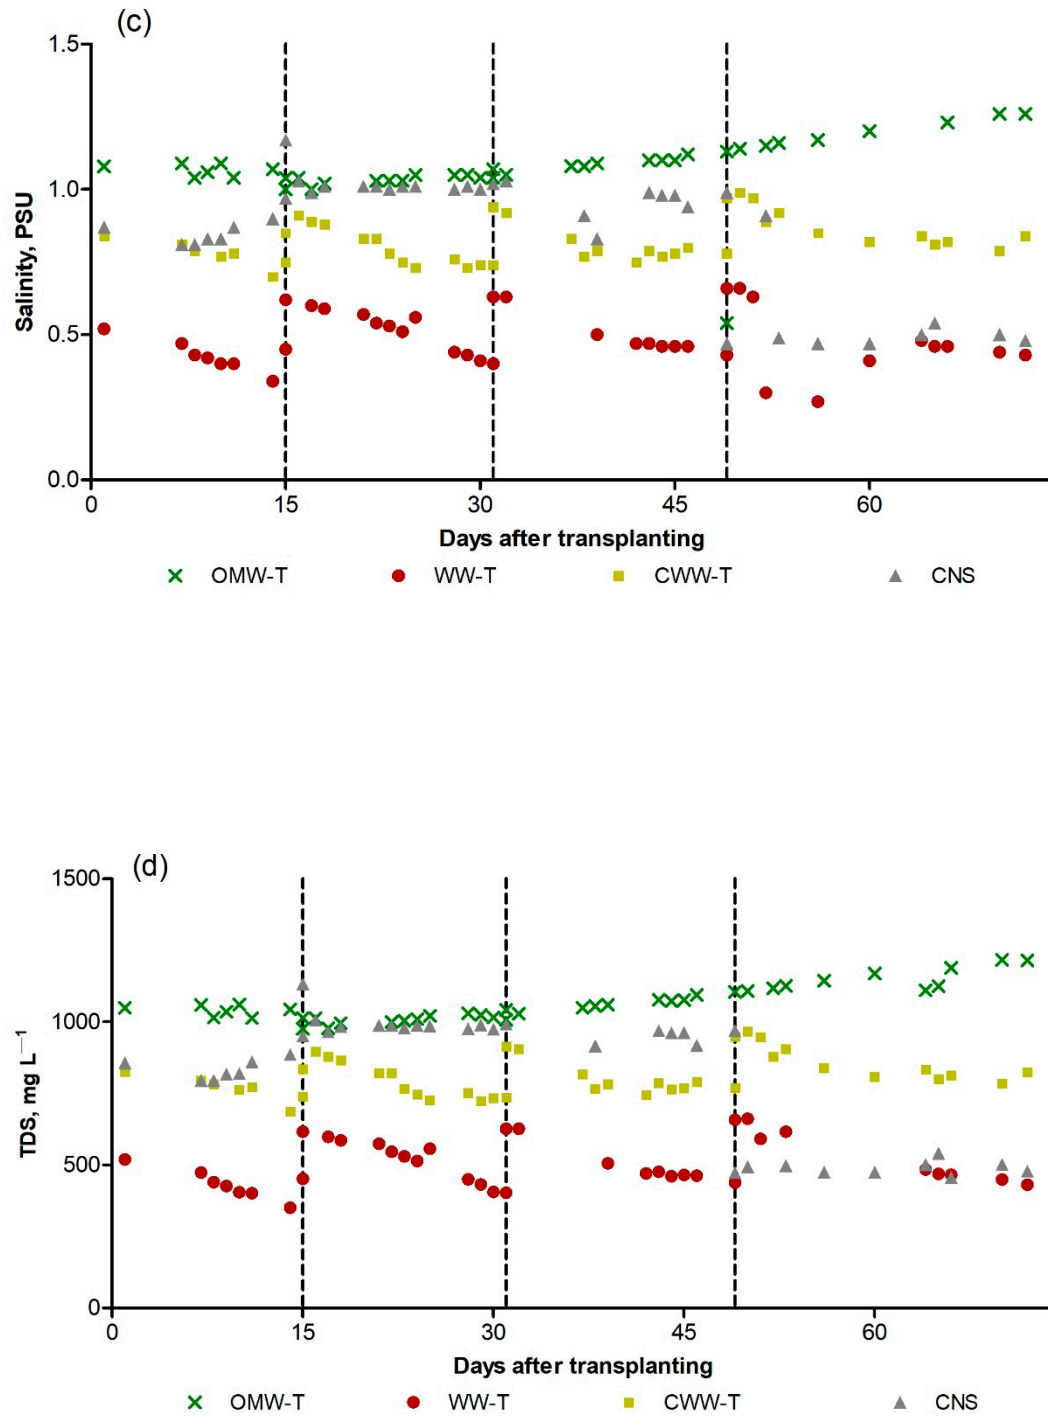

**Figure S1.** Variation of (a) temperature, (b) ORP, (c) salinity, and (d) TDS in the different nutrient solutions, OMW-T, WW-T, CWW-T, and CNS, during the experimental period of the lettuce growth in the hydroponic system.
